# Supplementary material for: The Power of ESG Factors in Driving Financial Growth - Insights from Palestine
Source: Research Square preprint supplement (doi:10.21203/rs.3.rs-4276019/v2), 2024-08-20
Supplement: Supplementary file 1 [file 4f73e8eef93c9d77b635e9c6.docx]

Appendix I

**The ESG Index Checklist**

| **Themes** |
| --- |
| **Environmental Disclosure**   - **Emission** - Environmental management systems - Biodiversity - Waste - Emissions - **Innovation** - green revenues - capital expenditures - Research and development - Product creativity - **Resource use** - Environmental supply chain - Sustainable packaging - Energy - Water |
| **Social Disclosure**   - **Community** - Equally important to all industry groups, a median weight of five is assigned to all. - **Human rights** - **Product responsibility** - Policy data privacy - Product quality monitoring - Responsible marketing - **Workforce** - Health and safety - Working conditions - Career development and training - Diversity and inclusion |
| **Governance Disclosure**   - **CSR strategy** - ESG reporting and transparency - CSR strategy - **Management** - Compensation - Structure (Independence, committees) - **Shareholders** - Shareholders rights - Takeover defenses |

**Source(s):** Thomson Reuters ESG Scores Date of issue: March 2017
